# Supplementary material for: Diagnostic Performances of Different Genome Amplification Assays for the Detection of Swine Vesicular Disease Virus in Relation to Genomic Lineages That Circulated in Italy
Source: MDPI journal article supplement (doi:10.3390/v12111336), 2020-11-20
Supplement: s1 [file s1]

**Fig. S1.** Alignment of SVDV-3D sequences [including the nucleotide region 6870-7083 according to the reference strain UKG 27/72 (X54521.1)] showing mismatches for the 14 samples belonging to the sub-lineage 1 undetected in RT-LAMP.

|                         | ACCAATTGAGAAATGATTGCA                                                                         | GATGATGTGATAGCTTTCATACCCCGTGCCCYATCGATGCCT | CTGCTAGCTG            |
|-------------------------|-----------------------------------------------------------------------------------------------|--------------------------------------------|-----------------------|
|                         | 10          20          30          40          50          60          70          80        |                                            |                       |
| R1662/Catanzaro/Dec-14  | . . . . . G . . . . . C . . T . . . . . C . TG . . . . .                                      |                                            |                       |
| R1661/Salerno/Oct-14    | . . . . . G . . . . . . . . . . T . . . . . C . TG . . . . .                                  |                                            |                       |
| R1660/Potenza/Apr-14    | . . . . . . . . . . . C . . T . . . . . C . TG . . . . .                                      |                                            |                       |
| R1655/Isernia/Mar-12    | . . . . . . . . . . . . . . . T . . . . . C . G . . . . .                                     |                                            |                       |
| R1651/Campobasso/Dic-11 | . . . . . . . . . . . . . . . . T . . . . . C . G . . . . .                                   |                                            |                       |
| R1648/Salerno/Nov-11    | . . . . . . . . . . . . . . . . T . . . . . C . G . . . . .                                   |                                            |                       |
| R1647/Salerno/Nov-11    | . . . . . . . . . . . . . . . . T . . . . . C . G . . . . .                                   |                                            |                       |
| R1644/Salerno/Nov-11    | . . . . . . . . . . . . . . . . T . . . . . C . G . . . . .                                   |                                            |                       |
| R1616/Napoli/Apr-09     | . . . . . . . . . . . . . . . . . . . . . C . TG . . . . .                                    |                                            |                       |
| R1514/Brescia/Nov-06    | . . . . . . . . . . . . . . . . . . . . . C . TG . . . . .                                    |                                            |                       |
| R1493/Caserta/Feb-05    | . . . . . . . . . . . A . . . . . . . . . . C . TG . . . . .                                  |                                            |                       |
| R1408/Bergamo/May-02    | . . . . . . . . . . . . . . . . . . . . . C . TG . . . . .                                    |                                            |                       |
| R1332/Napoli/Dec-00     | . . . . . . . . . . . . . . . . . . . . . T . C . TG . . . . .                                |                                            |                       |
| R1329/Mantova/Mar-00    | . . . . . . . . . . . . . . . . . . . . . C . TG . . . . .                                    |                                            |                       |
| R1394/Firenze/May-02    | . . . . . . . . . . . . . . . . . . . . . C . TG . . . . .                                    |                                            |                       |
| R1567/Caserta/Apr-07    | . . . . . . . . . . . A . . . . . G . . . . . . . . . . T . . . . . C .                       |                                            |                       |
|                         | AAGCAGGGA                                                                                     | CAGCAGATAAAGGCGAGTG                        | ACCTGGACAAACGTG       |
|                         | 90          100          110          120          130          140          150          160 |                                            |                       |
| R1662/Catanzaro/Dec-14  | . G . . . . . . . . . . . . . . . . . . . . . G . . . . . G . . . . .                         |                                            |                       |
| R1661/Salerno/Oct-14    | . G . . . . . . . . . . . . . . . . . . . . . G . . . . . G . . . . .                         |                                            |                       |
| R1660/Potenza/Apr-14    | . G . . . . . . . . . . . . . . . . . . . . . . . . . . . . . . . . .                         |                                            |                       |
| R1655/Isernia/Mar-12    | . G . . . . . . . . . . . . . . . . . . . . . . . . . . . . . . . . .                         |                                            |                       |
| R1651/Campobasso/Dic-11 | . G . . . . . . . . . . . . . . . . . . . . . . . . . . . . . . . . .                         |                                            |                       |
| R1648/Salerno/Nov-11    | . G . . . A . . . . . . . . . . . . . . . . . . . . . . . . . . . . .                         |                                            |                       |
| R1647/Salerno/Nov-11    | . G . . . A . . . . . . . . . . . . . . . . . . . . . . . . . . . . .                         |                                            |                       |
| R1644/Salerno/Nov-11    | . G . . . A . . . . . . . . . . . . . . . . . . . . . . . . . . . . .                         |                                            |                       |
| R1616/Napoli/Apr-09     | . . . . . . . . . . . . . . . . . . . . . . . . . . . . . . . . .                             |                                            |                       |
| R1514/Brescia/Nov-06    | . . . . . . . . . . . . . . . . . . . . . . . . . . . . . . . . .                             |                                            |                       |
| R1493/Caserta/Feb-05    | . . . . . . . . . . . . . . . . . . . . . . . . . . . . . . . . .                             |                                            |                       |
| R1408/Bergamo/May-02    | . . . . . . . . . . . . . . . . . . . . . . . . . . . . . . . . .                             |                                            |                       |
| R1332/Napoli/Dec-00     | . . . . . . . . . . . . . . . . . . . . . . . . . . . . . . . . .                             |                                            |                       |
| R1329/Mantova/Mar-00    | . . . . . . . . . . . . . . . . . . . . . . . . . . . . . . . . .                             |                                            |                       |
| R1394/Firenze/May-02    | . . . . . . . . . . . . . . . . . . . . . . . . . . . . . . . . .                             |                                            |                       |
| R1567/Caserta/Apr-07    | . G . . . . . . . . . . . . . . . . . . . . . G . . . A . T . . . . . G .                     |                                            |                       |
|                         | ACCT                                                                                          | AGGTAYTTTAGGGCAGAT                         | TACCRCRTTTTGGTGCCATCC |
|                         | 170          180          190          200          210                                       |                                            |                       |
| R1662/Catanzaro/Dec-14  | . . . . . . . . . . . . . . . . . . . . . C . . . . . . . . . .                               |                                            |                       |
| R1661/Salerno/Oct-14    | . . . . . . . . . . . C . . . . . . . . . . C . . . . . . . . . .                             |                                            |                       |
| R1660/Potenza/Apr-14    | . . . . . . . . . . . . . . . . . . . . . C . . . . . . . . . .                               |                                            |                       |
| R1655/Isernia/Mar-12    | . . . . . . . . . . . . . . . . . . . . . C . . . . . . . . . .                               |                                            |                       |
| R1651/Campobasso/Dic-11 | . . . . . . . . . . . . . . . . . . . . . C . . . . . . . . . .                               |                                            |                       |
| R1648/Salerno/Nov-11    | . . . . . . . . . . . . . . . . . . . . . C . . . . . . . . . .                               |                                            |                       |
| R1647/Salerno/Nov-11    | . . . . . . . . . . . . . . . . . . . . . C . . . . . . . . . .                               |                                            |                       |
| R1644/Salerno/Nov-11    | . . . . . . . . . . . . . . . . . . . . . C . . . . . . . . . .                               |                                            |                       |
| R1616/Napoli/Apr-09     | . . . . . A . . . . . C . . . . . . . . . . C . . . . . . . . . .                             |                                            |                       |
| R1514/Brescia/Nov-06    | . . . . . . . . . . . A . . . . . C . . . . . . . . . . C . . . . .                           |                                            |                       |
| R1493/Caserta/Feb-05    | . . . . . . . . . . . A . . . . . G . . . . . T . . . . . C . . . . .                         |                                            |                       |
| R1408/Bergamo/May-02    | . . . . . . . . . . . A . . . . . C . . . . . C . A . . . . .                                 |                                            |                       |
| R1332/Napoli/Dec-00     | . . . . . . . . . . . A . . . . . C . . . . . C . A . . . . .                                 |                                            |                       |
| R1329/Mantova/Mar-00    | . . . . . . . . . . . A . . . . . C . . . . . C . A . . . . .                                 |                                            |                       |
| R1394/Firenze/May-02    | . . . . . . . . . . . A . . . . . C . . . . . C . A . . . . .                                 |                                            |                       |
| R1567/Caserta/Apr-07    | . . . . . . . . . . . C . . . . . . . . . . . T . . . . .                                     |                                            |                       |

*Footnote:* Strains representative for sub-lineage 1 (R1394) and for sub-lineage 2 (R1567) are highlighted in grey. Target regions used in the RT-LAMP assay are highlighted in grey. Only nucleotide mismatches within the target regions are indicated; those found in R1567 representing sub-lineage 2 are in italic.
