# Supplementary material for: Diagnostic Performances of Different Genome Amplification Assays for the Detection of Swine Vesicular Disease Virus in Relation to Genomic Lineages That Circulated in Italy
Source: MDPI journal article supplement (doi:10.3390/v12111336), 2020-11-20
Supplement: s1 [file s1]

**Fig. S2.** Alignment of SVDV-5'UTR sequences [including the nucleotide region 252-332 according to the reference strain UKG 27/72 (X54521.1)] showing mismatches for the six samples belonging to sub-lineage 1 undetected in 2BIR rtRT-PCR.

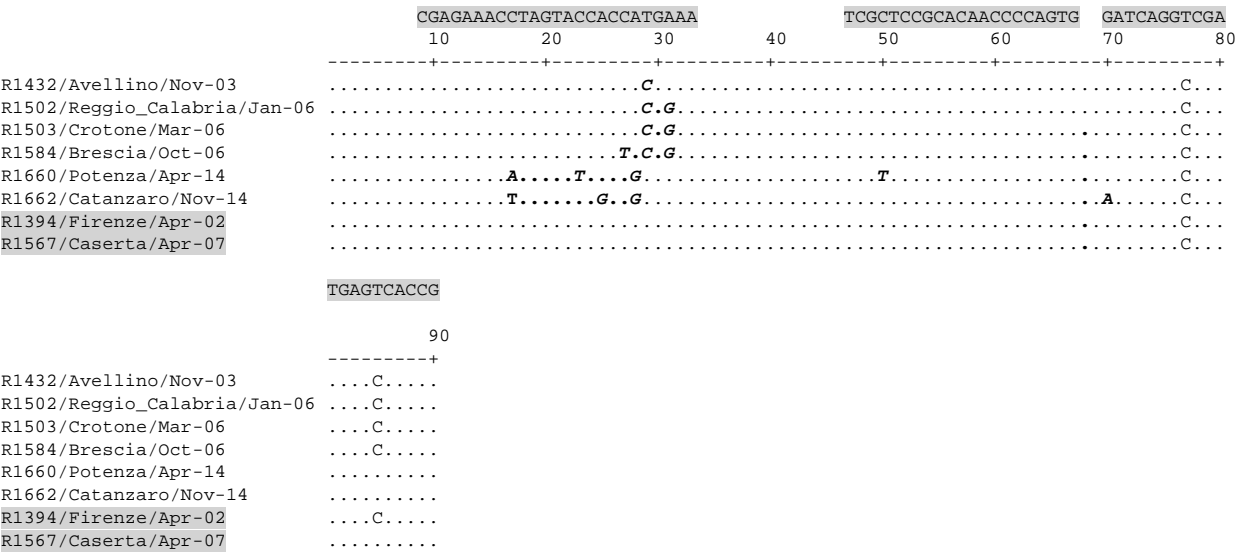

*Footnote:* Strains representative for sub-lineage 1 (R1394) and for sub-lineage 2 (R1567) are highlighted in grey. Primers and probe regions used in the 2BIR rtRT-PCR assay are highlighted in grey and nucleotide mismatches within them are indicated; those found only in the six missed samples and thus affecting the test result are in bold italic.
