# Supplementary material for: Diagnostic Performances of Different Genome Amplification Assays for the Detection of Swine Vesicular Disease Virus in Relation to Genomic Lineages That Circulated in Italy
Source: MDPI journal article supplement (doi:10.3390/v12111336), 2020-11-20
Supplement: s1 [file s1]

TABLE S1. Designation and origin of SVDV, Porcine teschoviruses (PTV), and Porcine enteroviruses (PEV) studied.

| Virus | Strain        | GenBank<br>sequence<br>number | Sample           | Geographic origin                | Date of<br>collection |
|-------|---------------|-------------------------------|------------------|----------------------------------|-----------------------|
| SVDV  | ITL/R1234/97  | MT856746                      | Faeces           | Perugia, Umbria                  | May 97                |
| SVDV  | ITL/R1261/98  | MT856747                      | Faeces           | Trento, Trentino Alto<br>Adige   | June 98               |
| SVDV  | ITL/R1267/98  | MT856748                      | Faeces           | Rovigo, Veneto                   | September 98          |
| SVDV  | ITL/R1291/99  | MT856749<br>MT878498*         | Faeces           | Brescia, Lombardia               | January 99            |
| SVDV  | ITL/R1293/99  | MT856750                      | Faeces           | Reggio Calabria,<br>Calabria     | January 99            |
| SVDV  | ITL/R1296/99  | MT856751                      | Faeces           | Cosenza, Calabria                | January 99            |
| SVDV  | ITL/R1297/99  | MT856752                      | Faeces           | Reggio Emilia, Emilia<br>Romagna | January 99            |
| SVDV  | ITL /R1329/00 | MT856753                      | Faeces           | Mantova, Lombardia               | March 00              |
| SVDV  | ITL/R1331/00  | MT856754                      | Faeces           | Brescia, Lombardia               | April 00              |
| SVDV  | ITL/R1332/00  | MT856755                      | Faeces           | Napoli, Campania                 | December 00           |
| SVDV  | ITL/R1335/01  | MT856756                      | Faeces           | Avellino, Campania               | March 01              |
| SVDV  | ITL/R1339/01  | MT856757                      | Faeces           | Napoli, Campania                 | December 01           |
| SVDV  | ITL/R1367/02  | MT856758                      | Faeces           | Pescara, Abruzzo                 | February 02           |
| SVDV  | ITL/R1376/02  | MT856759                      | Faeces           | Teramo, Abruzzo                  | March 02              |
| SVDV  | ITL/R1392/02  | MT856760                      | Faeces           | Reggio Calabria,<br>Calabria     | March 02              |
| SVDV  | ITL/R1393/02  | MT856761                      | Faeces           | Napoli, Campania                 | March 02              |
| SVDV  | ITL/R1394/02  | MT856762<br>MT878499*         | Cc and<br>Faeces | Firenze, Toscana                 | April 02              |
| SVDV  | ITL/R1400/02  | MT856763                      | Faeces           | Aquila, Abruzzo                  | May 02                |
| SVDV  | ITL/R1404/02  | MT856764                      | Faeces           | Padova, Veneto                   | May 02                |
| SVDV  | ITL/R1406/02  | MT856765                      | Faeces           | Cuneo, Piemonte                  | May 02                |
| SVDV  | ITL/R1408/02  | MT856766                      | Faeces           | Bergamo, Lombardia               | May 02                |
| SVDV  | ITL/R1410/02  | MT856767                      | Faeces           | Potenza, Basilicata              | September 02          |
| SVDV  | ITL/R1411/02  | MT856768                      | Faeces           | Crotone, Calabria                | September 02          |
| SVDV  | ITL/R1417/03  | MT856769                      | Faeces           | Salerno, Campania                | January 03            |
| SVDV  | ITL/R1427/03  | MT856770                      | Faeces           | Salerno, Campania                | September 03          |
| SVDV  | ITL/R1432/03  | MT856771<br>MT878500*         | Faeces           | Avellino, Campania               | November 03           |
| SVDV  | ITL/R1437/03  | MT856772                      | Faeces           | Catania, Sicilia                 | December 03           |
| SVDV  | ITL/R1443/04  | MT856773                      | Faeces           | Catanzaro, Calabria              | February 04           |
| SVDV  | ITL/R1445/04  | MT856774                      | Faeces           | Avellino, Campania               | February 04           |
| SVDV  | ITL/R1447/04  | MT856775                      | Faeces           | Perugia, Umbria                  | March 04              |
| SVDV  | ITL/R1451/04  | MT856776                      | Faeces           | Avellino, Campania               | March 04              |
| SVDV  | ITL/R1491/05  | MT856777                      | Faeces           | Aquila, Abruzzo                  | February 05           |
| SVDV  | ITL/R1493/05  | MT856778                      | Faeces           | Caserta, Campania                | February 05           |
| SVDV  | ITL/R1502/05  | MT856779<br>MT878501*         | Faeces           | Reggio Calabria,<br>Calabria     | January 06            |

|      |              |                       |                  |                               |              |
|------|--------------|-----------------------|------------------|-------------------------------|--------------|
| SVDV | ITL/R1503/06 | MT856780<br>MT878502* | Faeces           | Crotone, Calabria             | March 06     |
| SVDV | ITL/R1504/06 | MT856781              | Faeces           | Verona, Veneto                | November 06  |
| SVDV | ITL/R1507/06 | MT856782              | Faeces           | Salerno, Campania             | November 06  |
| SVDV | ITL/R1514/06 | MT856783              | Faeces           | Brescia, Lombardia            | November 06  |
| SVDV | ITL/R1529/06 | MT856784              | Faeces           | Campobasso, Molise            | December 06  |
| SVDV | ITL/R1541/07 | MT856785              | Faeces           | Catanzaro, Calabria           | January 07   |
| SVDV | ITL/R1542/07 | MT856786              | Faeces           | Salerno, Campania             | February 07  |
| SVDV | ITL/R1543/07 | MT856787              | Faeces           | Napoli, Campania              | February 07  |
| SVDV | ITL/R1546/07 | MT856788              | Faeces           | Salerno, Campania             | April 07     |
| SVDV | ITL/R1547/07 | MT856789              | Faeces           | Aquila, Abruzzo               | April 07     |
| SVDV | ITL/R1548/07 | MT856790<br>MT878503* | Faeces           | Napoli, Campania              | March 07     |
| SVDV | ITL/R1554/07 | MT856791<br>MT878504* | Faeces           | Frosinone, Lazio              | March 07     |
| SVDV | ITL/R1567/07 | MT856792<br>MT878505* | Cc and<br>Faeces | Caserta, Campania             | April 07     |
| SVDV | ITL/R1574/07 | MT856793<br>MT878506* | Faeces           | Brescia, Lombardia            | July 07      |
| SVDV | ITL/R1575/07 | MT856794              | Faeces           | Catanzaro, Calabria           | June 07      |
| SVDV | ITL/R1578/07 | MT856795              | Faeces           | Cremona, Lombardia            | July 07      |
| SVDV | ITL/R1584/07 | MT856796<br>MT878507* | Faeces           | Brescia, Lombardia            | October 07   |
| SVDV | ITL/R1594/08 | MT856797              | Faeces           | Arezzo, Toscana               | September 08 |
| SVDV | ITL/R1595/08 | MT856798              | Faeces           | Aquila, Abruzzo               | October 08   |
| SVDV | ITL/R1596/08 | MT856799<br>MT878508* | Faeces           | Arezzo, Toscana               | October 08   |
| SVDV | ITL/R1598/08 | MT856800              | Faeces           | Roma Lazio                    | October 08   |
| SVDV | ITL/R1599/08 | MT856801              | Faeces           | Latina, Lazio                 | October 08   |
| SVDV | ITL/R1602/08 | MT856802<br>MT878509* | Faeces           | Rieti, Lazio                  | October 08   |
| SVDV | ITL/R1603/08 | MT856803<br>MT878510* | Faeces           | Perugia, Umbria               | October 08   |
| SVDV | ITL/R1606/08 | MT856804              | Faeces           | Perugia, Umbria               | November 08  |
| SVDV | ITL/R1608/08 | MT856805              | Faeces           | Latina, Lazio                 | December 08  |
| SVDV | ITL/R1611/08 | MT856806              | Faeces           | Catanzaro, Reggio<br>Calabria | March 09     |
| SVDV | ITL/R1613/09 | MT856807              | Faeces           | Reggio Calabria,<br>Calabria  | March 09     |
| SVDV | ITL/R1614/09 | MT856808              | Faeces           | Napoli Campania               | March 09     |
| SVDV | ITL/R1615/09 | MT856809<br>MT878511* | Faeces           | Perugia, Umbria               | March 09     |
| SVDV | ITL/R1616/09 | MT856810              | Faeces           | Napoli, Campania              | April 09     |
| SVDV | ITL/R1619/09 | MT856811              | Faeces           | Catanzaro, Calabria           | July 09      |
| SVDV | ITL/R1625/10 | MT856812<br>MT878512* | Faeces           | Catania, Sicilia              | January 10   |
| SVDV | ITL/R1644/11 | MT856813<br>MT878513* | Faeces           | Salerno, Campania             | November 11  |
| SVDV | ITL/R1647/11 | MT856814<br>MT878514* | Faeces           | Salerno, Campania             | November 11  |
| SVDV | ITL/R1648/11 | MT856815<br>MT878515* | Faeces           | Salerno, Campania             | November 11  |
| SVDV | ITL/R1651/11 | MT856816<br>MT878516* | Faeces           | Campobasso,<br>Basilicata     | December 11  |

|      |              |                       |        |                              |             |
|------|--------------|-----------------------|--------|------------------------------|-------------|
| SVDV | ITL/R1655/12 | MT856817<br>MT878517* | Faeces | Isernia, Molise              | March 12    |
| SVDV | ITL/R1656/12 | MT856818<br>MT878518* | Faeces | Isernia, Molise              | April 12    |
| SVDV | ITL/R1657/12 | MT856819<br>MT878519* | Faeces | Avellino, Campania           | April 12    |
| SVDV | ITL/R1658/13 | MT856820<br>MT878520* | Faeces | Reggio Calabria,<br>Calabria | April 13    |
| SVDV | ITL/R1660/14 | MT856821<br>MT878521* | Faeces | Potenza, Basilicata          | April 14    |
| SVDV | ITL/R1661/14 | MT856822<br>MT878522* | Faeces | Salerno, Campania            | October 14  |
| SVDV | ITL/R1662/14 | MT856823<br>MT878523* | Faeces | Catanzaro, Calabria          | November 14 |
| SVDV | Por 1/03     | DQ250543              | /      | /                            | December 03 |
| SVDV | UKG 27/72    | X54521.1              | Cc     | Staffordshire UK             | December 72 |
| PTV  | PS-34        | /                     | Cc     | Verona, Veneto               | /           |
| PTV  | O3b          | /                     | Cc     | Verona, Veneto               | /           |
| PTV  | O2b          | /                     | Cc     | Verona, Veneto               | /           |
| PTV  | PS-36        | /                     | Cc     | Verona, Veneto               | /           |
| PTV  | F26          | /                     | Cc     | IAH, Pirbright, UK           | /           |
| PTV  | PS-37        | /                     | Cc     | Verona, Veneto               | /           |
| PTV  | WR2          | /                     | Cc     | Verona, Veneto               | /           |
| PEV  | PS-27        | /                     | Cc     | Verona, Veneto               | /           |
| PEV  | UKG/410/73   | /                     | Cc     | IAH, Pirbright, UK           | /           |
| PEV  | UKG/LP54/75  | /                     | Cc     | IAH, Pirbright, UK           | /           |

3

4 *Footnote:* GenBank numbers are referred to the sequenced portions of the 3D coding gene and of the 5'UTR region, the  
5 latter are superscripted with (\*); for the reference strain UKG 27/72 the GenBank number refers to the complete genome.

6

7
